# Supplementary material for: Pax2/8 act redundantly to specify glycinergic and GABAergic fates of multiple spinal interneurons
Source: PubMed Central journal article supplement (PMC2849013; doi:10.1016/j.ydbio.2008.08.009), 2008-11-01
Supplement: mmc1.pdf [file mmc1.pdf]

**Table 1. Number of cells expressing particular neurotransmitters in the Pax2/8 expression domain in different Pax2 and Pax8 knock-down experiments**

| <b>Experiment</b>              | <b>Glycinergic</b> | <b>GABAergic</b> | <b>Glutamatergic</b> |
|--------------------------------|--------------------|------------------|----------------------|
| <b>WT</b>                      | 55.8 +/- 3.4       | 14 +/- 1.4       | 55+/-4.89            |
| <i>noi</i> mutant              | 60.4 +/- 7.1       | 17 +/- 3.4       | ND                   |
| <i>pax2b</i> MO                | 55 +/- 0.7         | 18 +/- 2.23      | ND                   |
| <i>pax8</i> MOs                | 54.17 +/- 1.25     | 14.16 +/- 3.54   | ND                   |
| <i>pax2b</i> MO + <i>noi</i>   | 31.36 +/- 4.25     | 14.9 +/- 2.02    | ND                   |
| <i>pax2b</i> + <i>pax8</i> MOs | 28.7 +/- 1.97      | 15.4 +/- 3.36    | ND                   |
| <i>pax8</i> MOs + <i>noi</i>   | 40.67 +/- 6.2      | 14.5 +/- 3.13    | ND                   |
| <b>TKD</b>                     | 20.4 +/-5.9        | 8.75 +/- 2.7     | 58.42+/-5.40         |
