# Supplementary material for: Pax2/8 act redundantly to specify glycinergic and GABAergic fates of multiple spinal interneurons
Source: PubMed Central journal article supplement (PMC2849013; doi:10.1016/j.ydbio.2008.08.009), 2008-11-01
Supplement: mmc2.pdf [file mmc2.pdf]

**Table 2: p values for pair wise comparisons between different Pax2 and Pax8 knock-down experiments**

GABAergic results

| Expt                           | WT                       | <i>noi</i> mutant       | <i>pax2b</i> MO          | <i>pax8</i> MOs          | <i>pax2b</i> MO + <i>noi</i> | <i>pax2b</i> + <i>pax8</i> MOs | <i>pax8</i> MO + <i>noi</i> | TKD                     |
|--------------------------------|--------------------------|-------------------------|--------------------------|--------------------------|------------------------------|--------------------------------|-----------------------------|-------------------------|
| WT                             |                          | 0.10                    | 0.724                    | 0.031                    | 0.00047                      | 0.117                          | 0.0035                      | 1.36 x 10 <sup>-8</sup> |
| <i>noi</i> mutant              | 0.19                     |                         | 0.22                     | 0.34                     | 0.27                         | 0.76                           | 0.34                        | 0.00050                 |
| <i>pax2b</i> MO                | 0.52                     | 0.16                    |                          | 0.059                    | 0.018                        | 0.193                          | 0.030                       | 3.39 x 10 <sup>-5</sup> |
| <i>pax8</i> MOs                | 0.049                    | 0.149                   | 0.627                    |                          | 0.879                        | 0.569                          | 0.85                        | 0.0057                  |
| <i>pax2b</i> MO+ <i>noi</i>    | 3.29 x 10 <sup>-10</sup> | 0.00027                 | 1.435x10 <sup>-9</sup>   | 4.65 x 10 <sup>-10</sup> |                              | 0.57                           | 0.94                        | 1.96x10 <sup>-6</sup>   |
| <i>pax2b</i> + <i>pax8</i> MOs | 6.88 x 10 <sup>-7</sup>  | 0.00035                 | 3.039x10 <sup>-8</sup>   | 1.81 x 10 <sup>-9</sup>  | 0.094                        |                                | 0.63                        | 0.0045                  |
| <i>pax8</i> MOs + <i>noi</i>   | 3.09 x 10 <sup>-6</sup>  | 0.0011                  | 5.31x10 <sup>-6</sup>    | 5.2 x 10 <sup>-6</sup>   | 0.0004                       | 2.28 x 10 <sup>-5</sup>        |                             | 6.44 x 10 <sup>-5</sup> |
| TKD                            | 2.0 x 10 <sup>-10</sup>  | 1.78 x 10 <sup>-5</sup> | 2.24 x 10 <sup>-10</sup> | 9.80 x 10 <sup>-10</sup> | 0.0016                       | 0.0005                         | 1.32 x 10 <sup>-7</sup>     |                         |

Glycinergic results
