# Supplementary material for: Pax2/8 act redundantly to specify glycinergic and GABAergic fates of multiple spinal interneurons
Source: PubMed Central journal article supplement (PMC2849013; doi:10.1016/j.ydbio.2008.08.009), 2008-11-01
Supplement: mmc3.pdf [file mmc3.pdf]

**Table 3. CiA axon length and soma size in wild type and triple knock-down embryos**

|                                                    | <b>WT</b>             | <b>TKD</b>            | p value for the comparison |
|----------------------------------------------------|-----------------------|-----------------------|----------------------------|
| <b>Cell body area (<math>\mu\text{m}^2</math>)</b> | 114.38 +/- 14.69      | 102.90 +/- 23.61      | 0.078                      |
| <b>Axon length (<math>\mu\text{m}</math>)</b>      | 85.57 +/- 17.78       | 81.17 +/-13.55        | 0.38                       |
| Number of cells examined                           | 22 cells in 7 embryos | 19 cells in 7 embryos |                            |
